# Supplementary material
Source: MDPI journal article supplement (https://www.mdpi.com/1996-1073/14/14/4181)
Supplement: s1 [file s1]

# Supplementary Materials: Assessing the Cost of Biomass and Bioenergy Production in Agroindustrial Processes

Elias Martinez-Hernandez\*, Myriam A. Amezcua-Allieri\* and Jorge Aburto\*

## 1. Economic modelling description

### 1.1. Netback of Biomass

For any case where you can have savings due to fuel switching to biomass and sale of excess energy, the netback of the biomass is calculated by the following equation:

$$NB = \frac{\text{Energy sales} + \text{Savings} - \text{total costs}}{m} \quad (1)$$

where NB is the netback,  $m$  is the biomass flow used. NB is equal to the maximum biomass price that allows for a net economic benefit. To calculate NB in \$/GJ, the value of Equation (1) is divided by the lower heating value of biomass.

Energy sales are the result of multiplying the amount of steam or electricity by its price. Net savings are the result of multiplying the amount of steam or electricity by the price of generating steam from fossil fuel and the price of grid electricity, respectively. Thus:

Energy sales =  $m_{\text{steam}} \times \text{steam price} + E_{\text{el}} \times \text{electricity price}$

Savings =  $m_{\text{steam}} \times \text{price of steam using other fuel} + E_{\text{el}} \times \text{grid electricity price}$

Note that the netback is determined without considering the cost of biomass.

### 1.2. Total Cost of Energy Production

The total cost of energy production (COP) is calculated as follows:

$$COP = E_{\text{imp}} \times p_{\text{el}} + W \times p_w + m \times p_b + ACC + O \quad (2)$$

where  $E_{\text{imp}}$  is the amount of electricity imported from the grid (if applicable),  $p_{\text{el}}$  price paid for such electricity.  $W$  is the amount of water used for steam generation,  $p_w$  is the price paid for water.  $m$  is the biomass flow and  $p_b$  is the reference price of biomass. This reference price may be the price of biomass for alternative use, or the price currently paid, if known. ACC is annualised capital expenditure,  $O$  are other costs, including maintenance and other raw materials.

### 1.3. Capital Costs

The annual capital cost is derived from the estimate of the total investment. The total investment (TI) is determined by:

$$TI = CP + WC + SV + RD + \text{others} \quad (3)$$

where  $CP$  is the total installed cost of the plant, including equipment purchase, construction, installation, etc.  $WC$  is working capital,  $SV$  is the start-up and validation expense,  $RD$  is the cost of research and development and others may include licensing cost, etc. In the current model version, only the total cost of the plant will be considered, since the other items do not necessarily apply in the case of self-consumption bioenergy production. The total installed cost of the plant is then determined from the cost of the equipment and applying a factor that considers the costs of installation, construction, auxiliary installations, land, instrumentation, etc. This factor is known as Lang's factor:

$$CP = CTE * f_L \quad (4)$$

where  $CTE$  is the total cost of buying the equipment, and is the Lang factor that varies between approximately 3 and 5. The total cost of purchasing the equipment depends on

the size of the equipment, and therefore, how much biomass is processed. The cost of a piece of equipment ( $ceq$ ) is determined by the following equation:

$$ceq = Co \left( \frac{Q}{Qo} \right)^b \quad (5)$$

where  $Co$  is a known base cost to a known  $Qo$  base size or capacity,  $Q$  is the required capacity of the equipment, and  $b$  is the scaling exponent. Each base cost can be in reference to a certain year, so the cost is updated to the year of analysis by using the Chemical Process Plant Index ( $CEPCI$ ), which is an indicator of inflation in the cost of plants accepted for estimation purposes (Chemical Engineering Magazine, 2020). The update is then done as follows:

$$ceq_a = ceq_b \left( \frac{CEPCIa}{CEPCIb} \right) \quad (6)$$

where  $ceq_a$  is the cost updated per year to, while

$ceq_b$  is the cost per reference year  $b$ ,  $CEPCIa$  is the index in year  $a$ , and  $CEPCIb$  is the index in year  $b$ .

The total cost of purchasing the equipment is then:

$$CTE = \sum_{i=1}^n ceq_{a_i} \quad (7)$$

where  $n$  is the total number of computers. Currently, the model considers the following equipment: boiler, backpressure turbine, water pump, and air fan.

Once  $CTE$  is obtained, you can calculate  $CP$  (Equation (4)) and then  $TI$  (Equation (3)). From  $TI$ , the annual cost of capital is determined. If the investment is financed by a credit:

$$ACC = IT \times arate + Dep \quad (8)$$

where  $arate$  is the capital cost annualisation factor for a given interest rate.  $Dep$  is depreciation. When the investment is made by dividends, only depreciation is considered:

$$ACC = Dep \quad (9)$$

The model considers the salvage value at the end of the life of the evaluated project. The model then considers linear depreciation over a specified depreciation period:

$$Dep = \frac{IT(1-s)}{tdep} \quad (10)$$

where  $s$  is the fraction of the initial investment as the life value.  $tdep$  is the depreciation period.

#### 1.4. Other Costs

For the term  $O$  of other costs in Equation (1), this model considers the cost of maintenance, the cost of labour, and others,

$$O = C_m + C_l + C_{otros} \quad (11)$$

The cost of maintenance and others are calculated as a percentage of the total cost of the plant:

$$C_m + C_{otros} = CP(f_m + f_{otros}) \quad (12)$$

where  $f_m$  is the percentage of maintenance, and  $f_{otros}$  is the percentage for other costs.

The labour cost is calculated by multiplying the total number of hours of operation in one year (per hourly cost of labour). In this current model, this hourly cost is a weighted average of all positions on the plant.

$$C_l = top \times c_{mo} \quad (13)$$

### 1.5. Economic indicators

For a given reference biomass price, the model also calculates a net present value (VPN), internal rate of return (TIR), and payback period indicators. The equations calculating these indicators are reported elsewhere and are common to all economic evaluations in the models.

## 2. Upstream Model Description

### 2.1. Cultivation Cost

The model for cultivation cost consists of the cumulative costs for the establishment, maintenance, harvesting and other cultivation activities. The cost for establishment is divided by the rotation cycle of the crop, so that the total sum of cultivation cost can be written as:

$$CC = \sum_j \sum_i x_{i,j} C_i + \frac{\sum_i x_{i,establish} C_i}{T} \quad (14)$$

where  $CC$  is cultivation cost,  $x_{i,j}$  is the amount of input  $i$  in stage  $j$  with  $j=\{\text{maintenance, harvesting and other}\}$ ,  $x_{i,establish}$  is the amount of input  $i$  in the establishment stage and  $T$  is the rotation cycle or lifetime of the plantation. Two hydric regimes are considered: rain-fed and irrigation. In a simplified model option, the user specifies the total cost for each regime, the percentage of each regime and the total cost is the weighted average using such percentage.

### 2.2. Transportation Cost

The transportation cost is estimated using a general fixed and variable cost parameter equation as follows:

$$TC = FC + VC(D) \quad (15)$$

where  $TC$  is transportation cost,  $FC$  is fixed cost and  $VC$  is variable cost parameters, while  $D$  is the average transportation distance. The parameters depend on the type of vehicle and its transportation capacities. The types of vehicles can be selected, and a percentage for each vehicle is specified by the user for a weighted cost calculation. In addition, the transportation means available are by road and train. The transportation cost by rail is calculated using the same equation with its corresponding parameters. In addition, two other model options are available for transportation by road. One directly uses the cost parameters from Tauro et al., multiplied by the amount transported and transportation distance:

$$TC = B(mD) \quad (16)$$

where  $B$  is the base cost,  $m$  is the mass transported and  $D$  is the distance. The parameter  $B$  is different for each type of vehicle available.

### 2.3. Agroindustrial and Conditioning Costs

In these two stages, an input-output model is used to determine first a mass balance using input factor and yield factors. For each raw material input the input flow is calculated using:

$$F_{input} = x_{input} F_{main input} \quad (17)$$

where  $F_{input}$  is the amount of raw material input to a process,  $x_{input}$  is the mass factor in kg raw material per kg of main input,  $F_{main input}$  is the amount of main input being processed (the main crop in the agro-industrial processing case, and the raw biomass stream in the conditioning case).

To calculate the amount of output, the equation used is:

$$F_{output} = x_{output} F_{main input} \quad (18)$$

where  $F_{input}$  is the amount of material output from the process,  $x_{output}$  is the mass factor in kg of output material per kg of main input. If the total flows are known instead of the factors, they can be specified, but the factor approach is preferred for the case of evaluating various processing capacities.

### 3. Agro-industrial process simulation results

**Table S1.** Simulation report as generated by the IMP Bio2Energy software for the tequila production process

| Mass balance       |                 |                    |                     |
|--------------------|-----------------|--------------------|---------------------|
| Stream             | Type            | Input flow (ton/y) | Output flow (ton/y) |
| Agave              | Main feed       | 19500              |                     |
| Water              | Raw material    | 6054.75            |                     |
| Yeast              | Raw material    | 23.4               |                     |
| Bagasse            | Biomass product |                    | 16408.79            |
| Tequila            | Product         |                    | 2683.2              |
| Methanol           | Product         |                    | 26.82               |
| Vinasse            | Emission/waste  |                    | 5712.23             |
| Tails              | Emission/waste  |                    | 747.123             |
| Total mass balance |                 | 25578.15           | 25578.18            |

| Utility demands |                |             |                    |                    |
|-----------------|----------------|-------------|--------------------|--------------------|
|                 | Utility        | Annual mand | de-Price (\$/unit) | Subtotal (\$/year) |
|                 | LP steam (ton) | 40692.79    | 14.879             | 605486.408         |
|                 | Electricity    | 1,374,945   | 0.0858             | 117970.281         |
|                 | Cooling water  | 9388.58     | 0.05               | 469.428            |

| Raw material and product prices, and waste disposal costs |                 |                    |                    |
|-----------------------------------------------------------|-----------------|--------------------|--------------------|
| Name                                                      | Type            | Price/Cost (\$/kg) | Subtotal (\$/year) |
| Agave                                                     | Main feed       | 1.1                | 21450000           |
| Water                                                     | Raw material    | 0.000125           | 757                |
| Yeast                                                     | Raw material    | 100                | 2340000            |
| Bagasse                                                   | Biomass product | 0.005              | 82                 |
| Tequila                                                   | Product         | 15                 | 40248              |
| Methanol                                                  | Product         | 0.05               | 1                  |
| Vinasse                                                   | Emission/waste  | 0.0025             | 14281              |
| Tails                                                     | Emission/waste  | 0.00125            | 934                |

| Economic Results                  |            |
|-----------------------------------|------------|
| Cost item                         | Value      |
| Total capital investment (\$)     | 2,462,990  |
| Annualised capital cost (\$/year) | 233,984    |
| Operating costs (\$/year)         | 24,629,897 |
| Total annual costs (\$/year)      | 24,863,881 |

**Allocation results**

| Product  | Flow (ton/y) | rate | Economic (\$/y) | value | Allocated (\$/ton) | cost |
|----------|--------------|------|-----------------|-------|--------------------|------|
| Bagasse  | 16408.8      |      | 82.04           |       | 3.08               |      |
| Tequila  | 2683.2       |      | 40248.00        |       | 9247.34            |      |
| Methanol | 26.8         |      | 1.34            |       | 30.82              |      |

**Table S2.** Simulation report as generated by the IMP Bio2Energy software for the coffee processing**Mass balance**

| Stream             | Type            | Input flow (ton/y) | Output flow (ton/y) |
|--------------------|-----------------|--------------------|---------------------|
| Coffee             | Main feed       | 47175              |                     |
| Coffee pulp        | Biomass product |                    | 19332.31            |
| Mucilago           | Emission/waste  |                    | 7548                |
| Evaporated water   | Emission/waste  |                    | 9435                |
| Pergamino          | Emission/waste  |                    | 2127.59             |
| Gold coffee        | Product         |                    | 8732.09             |
| Total mass balance |                 | 47175              | 47175               |

**Utility demands**

| Utility     | Annual mand | de-Price (\$/unit) | Subtotal (\$/year) |
|-------------|-------------|--------------------|--------------------|
| LP steam    | 32154.95175 | 14.87945           | 478448             |
| Electricity | 1,400,154   | 0.0858             | 120133             |

**Raw material and product prices, and waste disposal costs**

| Name        | Type            | Price/Cost (\$/kg) | Subtotal (\$/year) |
|-------------|-----------------|--------------------|--------------------|
| Coffee      | Main feed       | 0.35               | 16511250.00        |
| Coffee pulp | Biomass product | 0.01               | 96.66              |
| Mucilago    | Emission/waste  | 0.01               | 37740.00           |
| Pergamino   | Emission/waste  | 0.01               | 10637.96           |
| Gold coffee | Product         | 2.75               | 24013.25           |

**Economic Results**

| Cost item                         | Value      |
|-----------------------------------|------------|
| Total capital investment (\$)     | 1,727,972  |
| Annualised capital cost (\$/year) | 164,157    |
| Operating costs (\$/year)         | 17,279,721 |
| Total annual costs (\$/year)      | 17,443,879 |

**Allocation results**

| Product     | Flow (ton/y) | rate | Economic (\$/y) | value | Allocated (\$/ton) | cost |
|-------------|--------------|------|-----------------|-------|--------------------|------|
| Coffee pulp | 19332.3      |      | 96.66           |       | 3.62               |      |
| Gold coffee | 8732.1       |      | 24013.25        |       | 1989.67            |      |

**Table S3.** Simulation report as generated by the IMP Bio2Energy software for the orange processing

#### Mass balance

| Stream                    | Stream type     | Input flow (ton/y) | Output flow (ton/y) |
|---------------------------|-----------------|--------------------|---------------------|
| Orange                    | Main feed       | 633153             |                     |
| Process water             | Raw material    | 21087.79382        |                     |
| CaO                       | Raw material    | 601.49535          |                     |
| Orange peels              | Biomass product |                    | 171426.1748         |
| Concentrated orange juice | Product         |                    | 105014.8832         |
| Essential oil             | Product         |                    | 1673.6766           |
| Oil extraction wastewater | Emission/waste  |                    | 178568.9637         |
| Press liquor              | Emission/waste  |                    | 82022.5018          |
| Orange residue            | Emission/waste  |                    | 97141.4990          |
| Other emission/waste      | Emission/waste  |                    | 18994.59            |
| Total mass balance        |                 | 654842.2892        | 654842.2892         |

#### Utility demands

| Utility     | Annual demand | Price (\$/unit) | Subtotal (\$/year) |
|-------------|---------------|-----------------|--------------------|
| LP steam    | 79087.14123   | 14.87945        | 1176773            |
| Electricity | 12,741,210    | 0.0858          | 1093196            |

#### Raw material and product prices, and waste disposal costs

| Name                      | Type            | Price/Cost (\$/kg) | Subtotal (\$/year) |
|---------------------------|-----------------|--------------------|--------------------|
| Orange                    | Main feed       | 0.125              | 79144125           |
| Process water             | Raw material    | 0.001435           | 30260.984          |
| CaO                       | Raw material    | 0.3                | 180448.605         |
| Air                       | Raw material    | 0                  | 0                  |
| Other raw material        | Raw material    | 0                  | 0                  |
| Orange peels              | Biomass product | 0.005              | 857.130            |
| Concentrated orange juice | Product         | 2.72               | 285640.482         |
| Essential oil             | Product         | 12.5               | 20920.958          |
| D-limonene                | Product         | 12.5               | 0                  |
| Other product             | Product         | 0                  | 0                  |
| Oil extraction wastewater | Emission/waste  | 0.00011            | 19642.586          |
| Press liquor              | Emission/waste  | 0                  | 0                  |
| Orange residue            | Emission/waste  | 0                  | 0                  |
| Other emission/waste      | Emission/waste  | 0                  | 0                  |

#### Economic Results

| Cost item                         | Value         |
|-----------------------------------|---------------|
| Total capital investment (\$)     | 8,196,944.62  |
| Annualised capital cost (\$/year) | 778,709.74    |
| Operating costs (\$/year)         | 81,969,446.16 |
| Total annual costs (\$/year)      | 82,748,155.90 |

#### Allocation results

| Product                   | Flow (ton/y) | rate | Economic (\$/y) | value | Allocated (\$/ton) | cost |
|---------------------------|--------------|------|-----------------|-------|--------------------|------|
| Orange peels              | 171426.2     |      | 857.13          |       | 1.3458             |      |
| Concentrated orange juice | 105014.9     |      | 285640.48       |       | 732.1450           |      |
| Essential oil             | 1673.7       |      | 20920.95        |       | 3364.6371          |      |

**Table S4.** Simulation report as generated by the IMP Bio2Energy software for the orange peel drying

#### Mass balance

| Stream             | Input flow (ton/y) | Output flow (ton/y) |
|--------------------|--------------------|---------------------|
| Input biomass      | 171426             |                     |
| Dried biomass      |                    | 48978.8081          |
| Evaporated water   |                    | 122447.1918         |
| Total mass balance | 171426             | 171426              |

|                              |    |
|------------------------------|----|
| Biomass product moisture (%) | 30 |
|------------------------------|----|

#### Utility demands

| Utility     | Units | Annual demand |
|-------------|-------|---------------|
| Electricity | kWh   | 191,197       |
| Direct heat | MJ    | 113000000     |

#### 4. Sensitivity to electricity prices

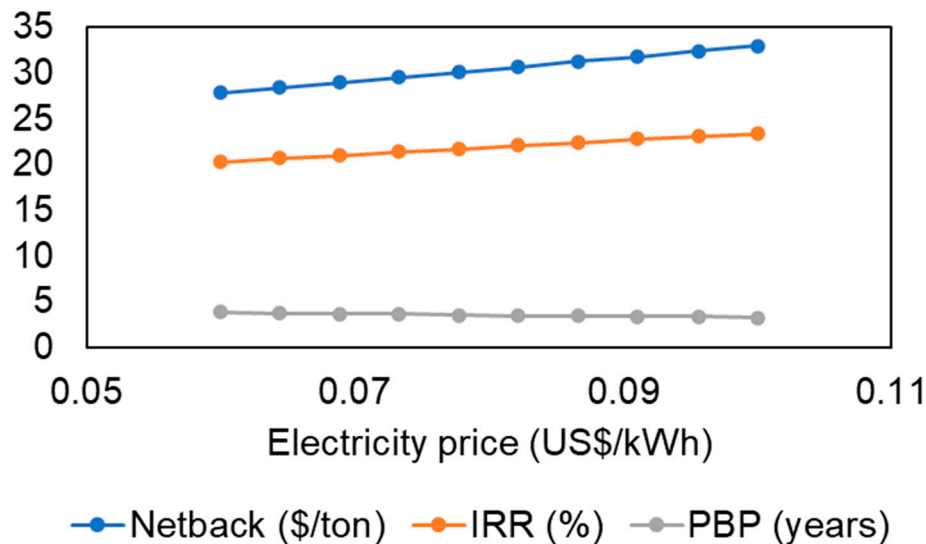

**Figure S1.** Sensitivity of electricity prices of agave bagasse case.

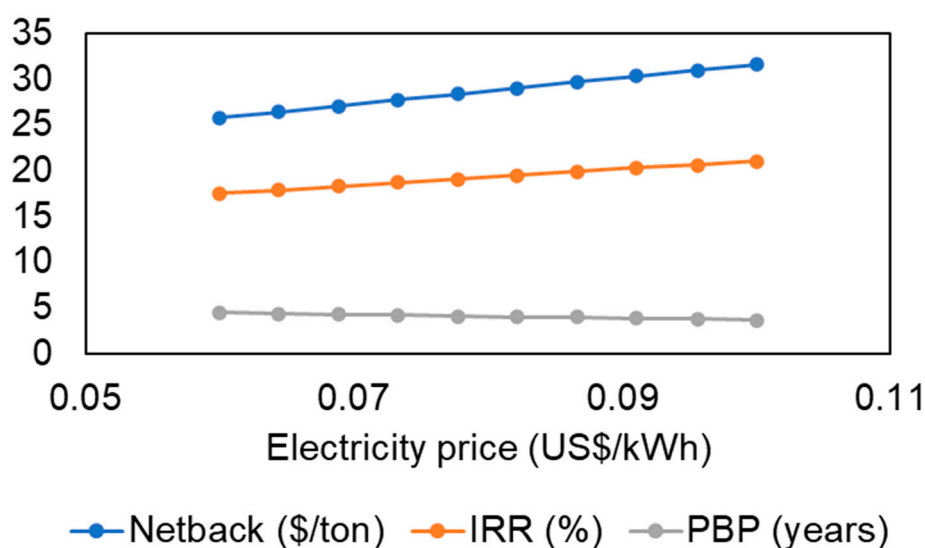

Figure S2. Sensitivity of electricity prices of coffee pulp case.

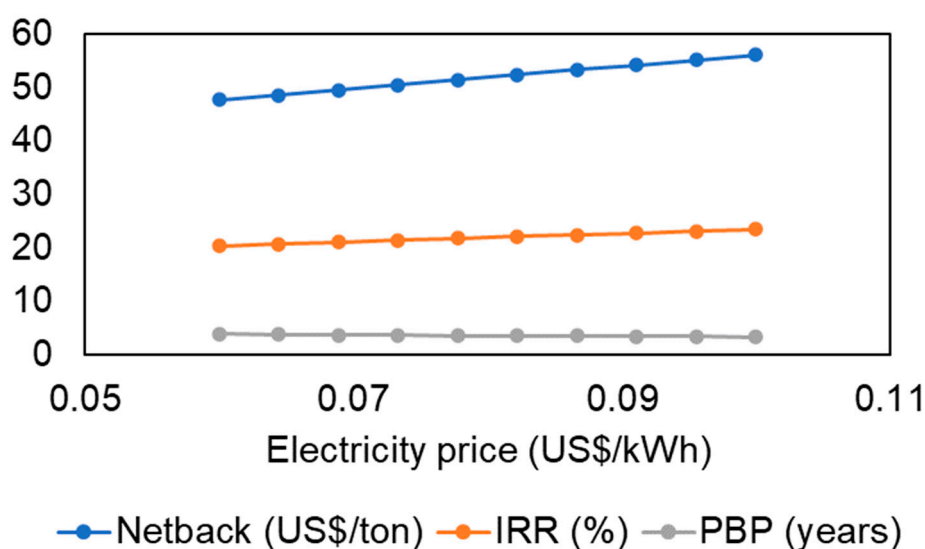

Figure S3. Sensitivity of electricity prices of orange peels case.

## 5. Two-way analysis of Variance (ANOVA) of sensitivity results

Table S5. ANOVA results for dependent variable Netback and independent variables biomass input and biomass type.

| Independent variable    | DF | Sum of squares | Mean square | F value | P value |
|-------------------------|----|----------------|-------------|---------|---------|
| Biomass input (ton/day) | 17 | 658.48         | 38.73       | 9.63 *  | 4.45e-4 |
| Biomass type            | 2  | 213.36         | 106.68      | 26.51 * | 1.01e-4 |
| Model                   | 19 | 2757.75        | 145.14      | 36.07   | 8.96e-7 |
| Error                   | 10 | 40.24          | 4.02        | --      | --      |
| Corrected total         | 29 | 2797.99        | --          | --      | --      |



**Table S6.** ANOVA results for dependent variable Netback and independent variables fossil fuel price and biomass type.

| Inde-<br>pendent<br>variable         | DF | Sum of<br>squares | Mean<br>square | F<br>value | P<br>value   |
|--------------------------------------|----|-------------------|----------------|------------|--------------|
| Fossil<br>fuel<br>price<br>(US\$/GJ) | 9  | 3921.53           | 435.73         | 24.99<br>* | 2.14e-<br>8  |
| Biomass<br>type                      | 2  | 3479.24           | 1739.62        | 99.80<br>* | 1.81e-<br>10 |
| Model                                | 11 | 7400.77           | 672.80         | 38.60      | 3.13e-<br>10 |
| Error                                | 18 | 313.76            | 17.43          | --         | --           |
| Cor-<br>rected<br>total              | 29 | 7714.52           | --             | --         | --           |

**Table S7.** ANOVA results for dependent variable Netback and independent variables boiler steam pressure and biomass type.

| Inde-<br>pen-<br>dent<br>varia-<br>ble    | DF | Sum of<br>squares | Mean<br>square | F<br>value   | P<br>value   |
|-------------------------------------------|----|-------------------|----------------|--------------|--------------|
| Boiler<br>steam<br>pres-<br>sure<br>(Bar) | 17 | 110.45            | 6.50           | 8.00 *       | 9.88e-<br>4  |
| Bio-<br>mass<br>type                      | 2  | 2822.48           | 1411.24        | 1737.71<br>* | 1.94e-<br>13 |
| Model                                     | 19 | 3850.14           | 202.64         | 249.52       | 6.57e-<br>11 |
| Error                                     | 10 | 8.12              | 0.81           | --           | --           |
| Cor-<br>rected<br>total                   | 29 | 3858.26           | --             | --           | --           |

**Table S8.** ANOVA results for dependent variable Unit cost and independent variables biomass input and biomass type.

| Inde-<br>pendent<br>variable  | DF | Sum of<br>squares | Mean<br>square | F<br>value | P<br>value  |
|-------------------------------|----|-------------------|----------------|------------|-------------|
| Biomass<br>input<br>(ton/day) | 17 | 13.03             | 0.77           | 28.38<br>* | 3.09e-<br>6 |
| Biomass<br>type               | 2  | 3.22              | 1.61           | 59.71<br>* | 2.75e-<br>6 |
| Model                         | 19 | 17.41             | 0.92           | 33.94      | 1.20e-<br>6 |
| Error                         | 10 | 0.27              | 0.027          | --         | --          |

|                         |    |       |    |    |    |
|-------------------------|----|-------|----|----|----|
| Cor-<br>rected<br>total | 29 | 17.68 | -- | -- | -- |
|-------------------------|----|-------|----|----|----|

**Table S9.** ANOVA results for dependent variable Unit cost and independent variables boiler steam pressure and biomass type.

| Inde-<br>pen-<br>dent<br>vari-<br>able    | DF | Sum of<br>squares | Mean<br>square | F<br>value | P<br>value  |
|-------------------------------------------|----|-------------------|----------------|------------|-------------|
| Boiler<br>steam<br>pres-<br>sure<br>(Bar) | 17 | 0.03              | 1.48e-<br>3    | 1.77       | 0.18        |
| Bio-<br>mass<br>type                      | 2  | 0.04              | 0.02           | 23.28<br>* | 1.73e-<br>4 |
| Model                                     | 19 | 0.12              | 6.50e-<br>3    | 7.74       | 1.06e-<br>3 |
| Error                                     | 10 | 8.40e-3           | 8.40e-<br>4    | --         | --          |
| Cor-<br>rected<br>total                   | 29 | 0.13              | --             | --         | --          |

**Table S10.** ANOVA results for dependent variable Payback period and independent variables biomass input and biomass.

| Inde-<br>pend-<br>ent<br>variable | DF | Sum of<br>squares | Mean<br>square | F<br>value | P<br>value  |
|-----------------------------------|----|-------------------|----------------|------------|-------------|
| Biomass<br>input<br>(ton/day)     | 17 | 49.15             | 2.89           | 16.65<br>* | 3.78e-<br>5 |
| Biomass<br>type                   | 2  | 14.27             | 7.14           | 41.09<br>* | 1.50e-<br>5 |
| Model                             | 19 | 62.18             | 3.27           | 18.85      | 1.96e-<br>5 |
| Error                             | 10 | 1.74              | 0.17           | --         | --          |
| Cor-<br>rected<br>total           | 29 | 63.92             | --             | --         | --          |

**Table S11.** ANOVA results for dependent variable Payback period and independent variables fossil fuel price and biomass type.

| De-<br>pendent<br>vari-<br>able: PBP<br>(years) | DF | Sum of<br>squares | Mean<br>square | F<br>value   | P<br>value |
|-------------------------------------------------|----|-------------------|----------------|--------------|------------|
| Fossil<br>fuel<br>price<br>(US\$/GJ)            | 9  | 45.09             | 5.01           | 1264.31<br>* | 0          |

|                 |    |       |      |          |          |
|-----------------|----|-------|------|----------|----------|
| Biomass type    | 2  | 1.77  | 0.88 | 223.15 * | 1.98e-13 |
| Model           | 11 | 46.86 | 4.26 | 1075.01  | 0        |
| Error           | 18 | 0.07  | 0.01 | --       | --       |
| Corrected total | 29 | 46.93 | --   | --       | --       |

**Table S12.** ANOVA results for dependent variable Payback period and independent variables boiler steam pressure and biomass type.

| De-<br>pen-<br>dent<br>variable:<br>PBP<br>(years) | DF | Sum of<br>squares | Mean<br>square | F<br>value | P<br>value |
|----------------------------------------------------|----|-------------------|----------------|------------|------------|
| Boiler<br>steam<br>pres-<br>sure<br>(Bar)          | 17 | 0.28              | 0.02           | 4.29 *     | 1.12e-3    |
| Bio-<br>mass<br>type                               | 2  | 0.14              | 0.08           | 20 *       | 3.20e-4    |
| Model                                              | 19 | 0.88              | 0.05           | 13.08      | 1.06e-4    |
| Error                                              | 10 | 0.04              | 0.35e-3        | --         | --         |
| Cor-<br>rected<br>total                            | 29 | 0.91              | --             | --         | --         |
